1 **Full Title:** “Around the clock”. Exploring health care professionals’ experience of discharge of  
2 older people during out of hours from the emergency department: a qualitative study.

3 **Short Title:** Older people and out of hours emergency department discharge.  
4

5 **Mary Dunnion<sup>1\*</sup>¶, Debbie Goode<sup>2</sup>¶, Assumpta Ryan<sup>1</sup>¶, Sonja McIlfatrick<sup>2</sup>¶,**

6 <sup>1</sup>School of Nursing and Paramedic Science, Faculty of Life and Health Sciences, Ulster  
7 University, Northland Road, Derry~Londonderry, United Kingdom.

8 <sup>2</sup>School of Nursing and Paramedic Sciences, Faculty of Life and Health Science, Ulster  
9 University, 2-24 York Street, Belfast, United Kingdom.

10 **\*Corresponding Author:** Mary Dunnion. Email: [Dunnion-m1@ulster.ac.uk](mailto:Dunnion-m1@ulster.ac.uk)

11 **ORCID:** Mary Dunnion <https://orcid.org/0000-0003-2648-5125>  
12

13 ¶¶These authors contributed equally to this work.  
14  
15  
16  
17  
18  
19  
20  
21  
22  
23  
24  
25  
26  
27  
28

## 29 **Abstract**

### 30 **Background**

31 Older adults constitute a considerable number of attendances at emergency departments  
32 (EDs). Whilst many require hospital admission, a greater focus now is on admission avoidance  
33 with older adults being subsequently discharged from EDs. Little is known, however, about  
34 the experiences out of hours (OOH) when specialist older person support services are  
35 unavailable.

### 36 **Aim**

37 To explore senior health care professionals' experiences of discharging older people during  
38 out of hours from EDs.

### 39 **Method**

40 A qualitative study involving individual semi-structured interviews was used to explore the  
41 experiences of healthcare professionals. Fourteen participants in total responded from a wide  
42 geographical spread. Data analysis was undertaken using Braun and Clarke's (2022) six-step  
43 framework for Thematic Analysis.

### 44 **Results**

45 One overarching theme was identified focusing on risks and safety for the older person whilst  
46 being discharged OOH from the ED. Three sub-themes included "Should they stay, or should  
47 they go?", "Bright lights and noise", and "New ways of working", which included risks in  
48 discharging an older person OOH from the ED, risks in delaying discharge, and  
49 recommendations for future practice. Significant differences were reported between office  
50 hours and OOH discharge of older adults from the ED. Diversity in practice assessments, and  
51 resources available was also evident across EDs. Significant adverse consequences were  
52 identified for older adults having to stay for prolonged periods in the ED.

## 53 **Conclusions**

54 There have been many welcome developments in healthcare services for older people who  
55 attend and are subsequently discharged from the ED. However, further innovative practice  
56 and collaboration with senior decision makers is needed to meet the healthcare needs of a  
57 rapidly ageing population. Safe, equitable and effective discharge practice 24/7 should be a  
58 norm for all older people in every ED regardless of location. Gaps in care identified must be  
59 addressed taking cognisance of the relevant recommendations for future practice.

60

61

62

63

64

65

66

67

68

69

70

71

72

73

74

## 75 Introduction

76 Countries worldwide are witnessing an unprecedented population increase in both the number  
77 and the proportion of older people (1). The United Nations General Assembly (2) projected  
78 that between 2019 and 2030, the number of persons aged 60 years or over will grow by 38  
79 per cent. According to Eliopoulos (3), older adults are generally defined as 65 years of age  
80 and older; however, several categories are also recognised, including, young old (65 to 74  
81 years); old (75 to 84 years) and oldest-old (85 years and over) taking cognisance of the  
82 diversity between these age groups. Alongside the demographic growth, a current focus on  
83 healthy ageing is advocated (4). However, by nature many older adults become unwell which  
84 often necessitates a visit to an emergency department (ED). This can often be a difficult  
85 experience for some older people who attend the ED with an atypical presentation and in an  
86 acutely unwell state. According to Cassarino et al (5) and Corcoran et al (6) attendance at the  
87 ED can result in high levels of adverse outcomes for older people. Issues with communication,  
88 privacy, and personal care for older people in the ED have been highlighted (7), whilst the ED  
89 has been reported as a complex, stressful and unpredictable area (8; 9). Although some older  
90 adults may require subsequent admission to hospital from the ED (10), many are discharged  
91 home from the department. Whilst the latter option may be the most preferable for older  
92 people, Cetin-Sahin (11) and Gettel et al (12) reported on several transitional care needs for  
93 patients following discharge.

94 It is imperative that the discharge process from the ED is safe, comprehensive, effective, and  
95 timely. However, outside of office hours (after 5pm until 8am and at all weekends and public  
96 holidays) many older person specialist teams are inaccessible in the ED or in the community  
97 which poses the question as to the experiences and risks for this cohort being discharged late  
98 at night or at weekends (13). Whilst some attention has been given to the discharge of older  
99 people from hospital at night (14), a review of the literature has identified a dearth of research  
100 regarding out of hours (OOH) discharge of older people from the ED. The aim of this paper

101 was to explore the experiences of Health Care Professionals (HCP) regarding the discharge  
102 of older people OOH versus during office hours from the ED.

103

## 104 **Methodology**

### 105 **Aim and Objectives**

106 This paper was part of an overall study exploring the discharge of older adults out of hours  
107 from the ED. This paper focused on the experiences of senior Health Care Professionals'  
108 when discharging older people during OOH versus office hours from the ED.

109 Objectives:

- 110 • To determine the experiences of HCPs when discharging older people from the ED
- 111 • To examine the differing practices, if any, between OOH and office hours discharge  
112 of older adults from the ED
- 113 • To identify recommendations for future practice when discharging older people OOH  
114 from the ED

### 115 **Study design**

116 In this study a qualitative methodology was used consisting of semi-structured interviews. The  
117 questions for the interviews were constructed by the researchers following a review of relevant  
118 literature, taking cognisance of the Integrated Care Theoretical Framework (15), the  
119 biopsychosocial aspects of health, and the Integrated Care Programmes for Older People  
120 (ICPOP). ICPOP was introduced in Ireland with an aim to improve quality of life for older  
121 people and to shift from acute hospital, episodic care to community based longitudinal,  
122 coordinated, and integrated care (16). This links in with the aim, objectives and theoretical  
123 framework of this study. The interview schedule (see Appendix 1) was developed by the

124 authors and reviewed by an ED expert group. A pilot study with one participant was also  
125 undertaken to ensure further rigour of the semi-structured questions.

## 126 **Population and Recruitment**

127 This study was undertaken in Ireland. Inclusion criteria for participants stipulated that they  
128 were required to be senior healthcare professionals working in an ED. Fourteen participants  
129 in total responded which included clinical nurse managers, consultants in emergency  
130 medicine, advanced nurse practitioners, clinical nurse specialists in frailty, clinical education  
131 facilitators and physiotherapists. Participants included a broad range of healthcare  
132 professionals and originated from a diversity of urban and rural geographical areas and  
133 models of hospitals which added to the rigour of the study.

## 134 **Ethical approval**

135 Ethical approval was obtained from Ulster University Research Ethics Filter committee  
136 (Project Number: FCNUR-22-017) as well as from the individual hospital Research Ethics  
137 Committees (RECs). No national ethics committee currently exists in Ireland; therefore,  
138 approval had to be sought from individual hospital RECs. In many of the sites, the Consultant  
139 in Emergency Medicine acted as gatekeeper for the research participants as stipulated by the  
140 hospital REC. Following confirmation of ethical approval, assistance to identify and invite  
141 participants to take part in the study was provided by members of The National Clinical  
142 Programme for Emergency Medicine and The Irish Association for Emergency Medicine. All  
143 participants were provided with a participation information sheet providing the purpose, risks,  
144 benefits of the study, the right to withdraw, and the assurance of anonymity. This was  
145 explained by one of the research team to each of the respondents and a consent form was  
146 subsequently signed by participants prior to commencement. Consent was also obtained for  
147 the possible dissemination of the study findings. Due to the small number of urban and rural  
148 EDs in Ireland, it was vital not to breach General Data Protection Regulations (GDPR) by

149 identifying any of the hospitals and/or the participants who contributed to the study. Therefore,  
150 careful selection and reporting of the narrative exemplars was undertaken to take cognisance  
151 of and avoid the risk of this possibility.

## 152 **Data collection**

153 The recruitment period for this study was between February 17<sup>th</sup> and November 24<sup>th</sup>, 2023.  
154 One-to-one interviews were conducted. Written informed consent was obtained by the  
155 researcher and consent was reconfirmed at commencement of the interviews with all the  
156 participants. All interviews took place via video conferencing and at a time to suit the  
157 participants following individual consent to use this option. Due to the busyness of the ED  
158 environment, time constraints for participants and the distance between each site for the  
159 researcher, this method was deemed to be the most appropriate. Interviews lasted 50 to 60  
160 minutes in duration and were recorded using a digital recorder and via the computer to reduce  
161 the risk of loss of the interview data. Data saturation was reached following the final interview  
162 as no new data was noted and recruitment then ceased. The recordings were transcribed by  
163 one member of the research team and checked for accuracy prior to analysis (MD).

## 164 **Data analysis**

165 Data analysis was undertaken using Braun and Clarke's (17) six-step framework for Thematic  
166 Analysis (TA) which included familiarisation with the data set; coding; generating initial  
167 themes; developing and reviewing themes; refining, defining, and naming themes; and writing  
168 up. TA is a highly effective method to use when looking to analyse and understand a collection  
169 of experiences, thoughts, or behaviours (18), therefore taking cognisance of the aim of this  
170 study, this framework was selected as appropriate to use in this data analysis. These six steps  
171 involved a collaborative approach with the four members of the research team (MD, AR, DG,  
172 SMcl). Several meetings took place to interpret the data, identify categories, codes, provisional  
173 themes, edit and refine themes to ensure rigour, consensus, and a richer interpretation of the

174 data. These collaborative meetings with the experienced research team at all stages of the  
175 study are advocated to ensure reflexive practices in qualitative research (19; 20). The  
176 Standards for Reporting Qualitative Research (SRQR) (21) checklist was also completed to  
177 ensure rigour and a transparent reporting of the research process (see Appendix 2).

178

## 179 Findings

180 Following data analysis, several themes and sub-themes were identified. One recurrent theme  
181 highlighted the issues of risks and safety for older people being discharged from the ED OOH.  
182 In addition to this over-arching theme, several sub-themes were also identified (see Table 1).  
183 Significant differences were reported by the respondents between office hours and OOH  
184 discharge of older adults from the ED.

185

186 Table 1: Risks and Safety Theme and Sub-themes

| Theme                                       | Sub-themes                          |
|---------------------------------------------|-------------------------------------|
| Risks and safety during older person        | Should they stay or should they go? |
| Emergency Department discharge out of hours | Bright lights and noise             |
|                                             | New ways of working                 |

187

188

### 189 Should they stay or should they go?

190 Participants reported on the risks in OOH ED discharge for the older person. The safety  
191 decision to discharge an older adult OOH from the ED or to detain them until reviewed by



192 specialist older people services during office hours was influenced by several factors, including  
193 the time of discharge and distance to home. However, if there was any concern that the older  
194 person required more support following discharge OOH, it was reported that s/he would be  
195 detained or “boarded for review” in ED until 8am when older person specialist staff are  
196 available. This was despite staff being aware of the pressures of not having people lying on  
197 trolleys.

198 *“It’s two or four in the morning, but they are a very vulnerable high-risk patient .... and they’re*  
199 *going to go home to an empty house where there is no one. There’s not a light on... we*  
200 *would keep them until the morning.” (Clinical Nurse Manager No. 2)*

201 Participants reported being conscious of the need to ensure safe discharge and refer older  
202 people to the specialist supports in the ED and the community OOH. They also reported the  
203 benefits of having these specialist older person teams as a great form of support. However,  
204 participants also identified difficulties with the limited availability of these specialists OOH  
205 whilst trying to run a 24-hour service in the department and the need to make a quick decision.  
206 During OOH, it was identified that admission avoidance became a difficulty due to a lack of  
207 resources for the older person both within the ED and in the community as these specialist  
208 staff are not on duty. OOH discharge was not deemed to be as safe as office hours. Often  
209 older adults would end up having to stay in ED or be admitted due to an identified risky  
210 discharge OOH, especially at weekends.

211 *“There is a huge differential in you coming and being seen by a Frailty Intervention Team*  
212 *during office hours on Monday to Friday and you coming to the emergency department at*  
213 *any other time.” (Consultant in Emergency Medicine No.1)*

214 Respondents also reported a level of risk based on the variances of when assessments were  
215 undertaken, and their suitability for assessing older people attending the ED. This included  
216 triage and frailty assessments following ED presentation. Variances existed in relation to if,  
217 and when, these assessments took place, and the scales used. Some participants reported

218 that frailty assessments were not undertaken at the initial triage assessment and not at all  
219 during OOH due to demands on and availability of specialist older person team members, and  
220 the numbers of attendees to the ED. Others reported it was the first important step and always  
221 tried to get older people assessed as quickly as possible. Again, variances occurred between  
222 office hours and OOH practice.

223 *“We do the clinical frailty scale.... The triage nurses are overwhelmed.... They can’t keep up*  
224 *with the tsunami of patients coming through, so that would be done post triage.” (Consultant*  
225 *in Emergency Medicine No. 1)*

226 Several respondents reported strategies to reduce risk and ensure safety for older people  
227 when being discharged home OOH from the ED. These included arranging transport,  
228 providing a staff escort for support and to ensure safety, and using a discharge lounge which  
229 was only available during office hours. Practices varied between hospitals. Many hospitals  
230 witnessed changing variances in staff profiles and skill mix with staff turnover being significant  
231 in some areas. This change in personnel following the employment of many international  
232 nurses to Ireland was reported to be a difficulty for the older adult in the ED, with cultural and  
233 language differences evident. This was identified as a specific issue OOH when no specialist  
234 frailty team support was available to support these new international staff members who may  
235 be unfamiliar with the specific needs of older people on discharge from the ED. Thus, adding  
236 to a potential risk on OOH discharge. Other challenges identified included the increasing  
237 numbers of international older adults with growing health care needs living in inappropriate  
238 places such as hotels, and associated difficulties in accessing support on discharge from the  
239 ED.

240 *“There are issues with new staff from outside of Ireland, and the biggest problem is*  
241 *communication particularly for the elderly patient. Language is a big thing, same with the*  
242 *doctor. They just have a different culture. They just presume that there is going to be*  
243 *somebody at home to look after that patient, because that's what they would do.” (Clinical*  
244 *Education Facilitator No. 4)*

## 245 **Bright lights and noise**

246 Participants identified several risks for the older adults who were delayed or detained in the  
247 ED OOH whilst awaiting discharge, often because of an overstimulated environment resulting  
248 in adverse consequences. These included significant biological and psychological effects such  
249 as sleep deprivation, anxiety, delirium, and medication and mobility issues. Older people also  
250 faced challenges within the ED environment, including being exposed to frightening incidents,  
251 and the risks of acquiring infections and pressure ulcers. A drop in the level of supervision  
252 and care from HCPs was also a concern once an older person was deemed fit for discharge  
253 but awaiting review by the specialist team.

254 *“Older people staying in an ED can.... get sicker, pressure sores and anxiety..... you have to*  
255 *weigh up the pros and cons and what is safest in the long run and having to keep them in to*  
256 *be seen by the team the next morning.” (Clinical Nurse Specialist in Frailty, No. 2)*

257 Keeping an older person in ED OOH for follow-up by the older person services although  
258 medically discharged was reported to result in an increase in patient experience times and a  
259 reduction in patient flow within the ED. This was identified as a cause of stress for staff and  
260 an increase in workload, due to overcrowding within the ED but also due to a reflection of poor  
261 ED performance because of prolonged patient experience times for those over 75 years of  
262 age.

263 *“Out of hours, where our colleagues notice an issue with a patient that would benefit from*  
264 *the multi-disciplinary team input, is when we would see that knock-on effect on time.”*  
265 *(Consultant in Emergency Medicine No.2)*

266 It was reported that older people also faced challenges within the ED environment OOH, as  
267 often no specific older person area was available within the ED due to the volume of  
268 attendances, overcrowding and a lack of space. Respondents reported that this could lead to  
269 increased adverse outcomes for the older person because of difficulties in meeting

270 fundamental needs, from having to stay overnight on a chair or trolley and often on a busy  
271 corridor.

272 “.... for a patient who has poly morbidities, their risks of having a negative outcome are much  
273 higher. There is also the risk of them not getting appropriate medications, and meals as well  
274 as not getting the toilet ....” (Consultant in Emergency Medicine No.2)

275

## 276 **New ways of working**

277 Participants interviewed recognised the difficulties in providing a 24-hour service in the ED,  
278 when their counterparts in other areas of the hospital and community services were not  
279 available. They were very forthcoming in providing recommendations for future practice to  
280 improve services for older people whilst being discharged from the ED OOH (see Figure 1).  
281 This included various aspects of discharge and care within the department and extending  
282 services to have specialist older person HCPs working 24/7 to ensure safe older person  
283 discharge from the ED OOH.

284

285

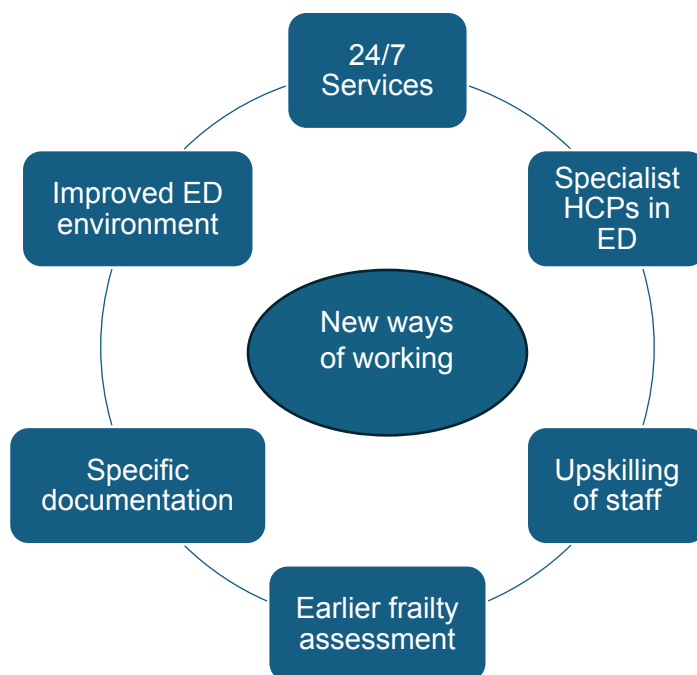

286

287

**Fig 1 New ways of working- recommendations for practice**

288

289 Many respondents identified the need to improve experiences OOH. This included ED staffing  
290 OOH, and the need for more older person specialist health care professionals 24/7 in the ED  
291 including physicians in older person emergency medicine and employment of a nurse to  
292 ensure any required follow-up is organised for older people following ED  
293 discharge. Respondents also highlighted the need for upskilling of all ED staff. With the  
294 increasing older person demographics, it was identified that a need existed to ensure that ED  
295 staff had the knowledge and skills to be able to provide a 24/7 service safely and effectively  
296 for this specialist cohort. This could be in the form of a national education programme.

297 *“..... that the ED staff themselves need a greater skills set which could be provided by a 2-  
298 day course with online learning .... we wouldn't contemplate having staff in the emergency  
299 department if they didn't have ACLS or ATLS training and yet, there isn't much of our work  
300 which is now cardiac arrest. There's far more of our work that is older adult now.”*

301

*(Consultant in Emergency Medicine No.1)*

302 Participants in this study recommended a greater and earlier focus on frailty on a 24/7 basis,  
303 not just at triage in the ED, but also pre-attendance by ambulance personnel and at primary  
304 care centres. This was identified as being very important considering the growth in older  
305 people demographics internationally and the associated risk of an increased incidence of  
306 frailty.

307 *“Ideally frailty should be scored in triage from the minute the person presents to the door. I*  
308 *think everybody should be thinking frailty..... to start scoring them coming through the door*  
309 *from triage. And even before that, the ambulance staff, the GP surgery.” (Clinical Nurse*  
310 *Specialist in Frailty No. 1)*

311 Recommendations from participants also included a need to focus on specific documentation  
312 which could identify and highlight the risk of frailty for the older person presenting to the ED.  
313 It was suggested that a national discharge checklist could help to ensure that there is  
314 uniformity in discharging the older person from the ED. A focus on written instructions and  
315 patient education for older people in the ED was also suggested in order to have a record of  
316 treatment provided and further care required. Improvements to the ED environment were also  
317 suggested. These included specific frailty units and separate treatment areas for older people  
318 as seen internationally. It was suggested that these could help reduce the risk of adverse  
319 reactions for older adults presenting to the ED by the avoidance of frightening experiences in  
320 a busy, highly stimulated ED.

321 *“What I would say needs to happen is to have an older person's unit, like a frailty unit part of*  
322 *the ED. In America some of the hospitals are just older people EDs because that's the*  
323 *population they're getting. Their whole focus in the 24 hours is older people. And that's the*  
324 *way it's going to be. It's not going to go away.” (Clinical Nurse Specialist in Frailty, No. 1)*

325

## 326 Discussion

327 This paper identified the safety and risk aspects of HCP's experiences of discharging older  
328 people during OOH versus office hours from the Emergency Department. Patient safety is  
329 defined as "the reduction of risk of unnecessary harm associated with healthcare to an  
330 acceptable minimum" (22). However, it is estimated that around one in ten patients are harmed  
331 during health care, resulting in substantial consequences for patients (23). Discharge  
332 processes are an important aspect of a patient's health care journey. Many older adults who  
333 attend the ED for assessment are subsequently discharged. Participants in this study  
334 highlighted risks for both discharging older people home OOH without organised supports and  
335 in keeping older patients in the ED until services are available. The results identified important  
336 but diverse practices regarding older people ED discharge occurring in different geographical  
337 areas and between OOH and office hours. Despite its unique and challenging clinical  
338 environment, the principles of patient-centred care and shared decision making are evident  
339 within the ED (24) with a holistic problem-solving, person-centred approach to discharge  
340 needed (14). Participants in this study were cognisant of the wishes of the older person;  
341 however, this was alongside their concern over patient safety if an adverse event were to  
342 occur post discharge or indeed in the ED OOH whilst waiting until further assessment could  
343 take place during office hours.

344 Whilst some developments in ED care are not new, such as an admission avoidance (AA)  
345 team (25), in more recent years many welcome developments have been realised in older  
346 person ED care and follow up in the community. These aim to expand community healthcare  
347 services to be closer to where older people reside and to reduce the demand on hospital  
348 services by admission avoidance and transition from hospital to home (26), recognising the  
349 risks of hospitalisation for this cohort. A study exploring the impact of Home FIRsT (Frailty  
350 Intervention & Response Team) interventions on older patients' experience times in the ED  
351 (27), identified a need for further research in the area. The authors recognised that  
352 assessments by the Home FIRsT can be lengthy and in EDs where there are waiting criteria  
353 (e.g. 4-hour National Health Service target), it would be particularly challenging to run such a

354 service. Although the study excluded patients attending out of hours, the authors did suggest  
355 a future potential to deliver continuous Home FIRsT-like services 24 hours a day, seven days  
356 a week, both in the ED and in community services. Interestingly, ED PLUS, an initiative  
357 introduced to link the transition of care between the ED visit and the community, was shown  
358 to result in a lower incidence of functional decline and improvement in quality of life for the  
359 older adult post ED (28). Whilst these developments are very welcome, the findings in this  
360 study showed that many older person specialist teams are inaccessible in the ED or in the  
361 community when discharge occurs OOH which impacted on the decision to discharge.

362 Point-of-care identification is needed for older adults presenting to the ED who may be at risk  
363 of adverse outcomes (29). Assessments including triage, comprehensive geriatric  
364 assessment, frailty and delirium assessments are regularly undertaken with the older person  
365 attending the ED. Zachariasse et al (30) and Brouns et al (31) reported that the validity of the  
366 Manchester Triage System in emergency care was moderate to good; however, lowest  
367 performance was in older patients over 65 years of age. Questions over the use of the  
368 Manchester Triage System with older adults in the ED also emerged in this study, with some  
369 participants expressing concerns over its suitability. Potential risks for older adults with frailty  
370 in the ED have been recognised. Frailty is often assessed using the Clinical Frailty Scale on  
371 a scale from 1-9, assessing domains such as comorbidity, function, and cognition (32).  
372 Significant findings from a cross-sectional study in 14 European countries, identified that 40%  
373 of older people attending the ED had a score of 5 or more when assessed using Rockwood  
374 et al's (33) Version 1.2 Clinical Frailty Scale (34). The use of a clinical frailty scale in ED may  
375 assist with prompt decision making at triage (35), timely access to appropriate care for older  
376 patients attending (36; 37), and in obtaining a more holistic clinical assessment (38).  
377 Additionally, early assessment and intervention in ED can increase patient satisfaction levels  
378 (5). Although not OOH focused, O'Shaughnessy et al (39), also identified that comprehensive  
379 geriatric assessment may help improve patient outcomes by achieving admission avoidance  
380 and thus avoiding any possible adverse consequences. However, the ED environment is not



381 appropriate for performing such in-depth assessments, with a need for quick and user-friendly  
382 tools (40) as frailty screening should be undertaken within four hours of attending the ED and  
383 take less than five minutes to complete (41). Daily encounters with older people with frailty will  
384 be a norm for almost all health and social care professionals (42). Therefore, staff must be  
385 cognisant of increased frailty especially during long department waits in overcrowded and  
386 sensory heightened areas present in many EDs. Despite the reported benefits of using a  
387 Clinical Frailty Scale at triage, this study identified that frailty assessment is not performed at  
388 triage in some hospitals and often never undertaken OOH, resulting in delayed or missed  
389 identification of some older adults with frailty.

390 Whilst early ED frailty screening at triage can transform care through fast tracking to required  
391 care pathways, education for all professionals is essential to ensure engagement in and  
392 recognition of frailty (43). Despite the prevalence of frailty, there is a lack of training in medical  
393 and nursing curricula and a need exists for education and skills development for HCPs (44).  
394 Emergency services must be equipped to provide care for older patients who present with  
395 complex health and care needs (34). Assessments can also be compounded by language  
396 barriers in nurse/patient communication which Ali and Watson (45) reported can have adverse  
397 effects on the provision of appropriate and effective care. Indeed, the World Health  
398 Organisation (46) highlighted the increase in the international migration and mobility of health  
399 workers. In this present study, participants identified communication issues between staff and  
400 older patients, and cultural and decision-making concerns during older person ED discharge  
401 OOH. Health education is an important aspect of ensuring safe discharge re treatment and  
402 follow-up. However, participants reported it as a difficulty for many patients being discharged  
403 from the ED. A need exists to ensure a greater adherence to discharge instructions and to  
404 improve the transition from ED to home (47), possibly using a multimodal approach in  
405 delivering discharge instructions (48). Participants in this study highlighted issues surrounding  
406 ED discharge information for older adults and recommended the need for specific older patient  
407 discharge information leaflets.

408 ED discharge is associated with increased risk with up to six months decline in functional  
409 status for the older adult living in the community (49). Concerningly almost 80% of older people  
410 are discharged from the ED with a minimum of one unaddressed health concern (Memedovich  
411 et al (50). Condon et al (51) explored the transition of older adults to the community from the  
412 ED. Whilst the qualitative review was not OOH focused, findings identified fragmented care,  
413 communication difficulties, reports of unplanned discharges with transport not being organised  
414 for older adults. Participants in this study identified that they had to consider many factors to  
415 ensure a safe older person ED discharge including time, distance, and transport issues.  
416 Discharging an older adult living alone in a rural area may not be a satisfactory start to the  
417 discharge process. In Ireland, around 5% of the population live 50km or more from an adult  
418 emergency department while 0.8% of the population have a travel distance of 75km or more  
419 (52). Time of discharge can be challenging for older people, especially at night when support  
420 networks and services in the community are less available (14).

421 This study also highlighted the risks in being detained in ED whilst awaiting further  
422 assessments prior to discharge. Older person ED discharge needs to be safe and effective on  
423 a 24/7 basis. However, although not specific to OOH, some of the challenges caring for older  
424 people in the ED, included the unsuitable physical environment and equipment,  
425 communication issues, a limited time factor, and a lack of geriatric-specific knowledge (53).  
426 Attendance at an ED can have adverse consequences for the older patient with dementia (54;  
427 8), which can be very distressing but avoidable for patients and their families. Healthcare  
428 systems benefit from providers delivering a positive patient experience (55). However, long  
429 waits, difficult waiting environments, lack of communication, privacy, and personal care have  
430 been identified previously as areas of concern for older people in the ED (7). Additionally,  
431 many healthcare needs of older adults are not being met either in the ED or by interventions  
432 initiated by the ED (50). Similarly, in this study, participants recognised the potentially serious  
433 risks in keeping an older adult for extended periods of time in the ED, which included risk of  
434 infection, delirium, anxiety, and possible neglect. Often this delay OOH was due to the

435 perceived risks for the older person, and the unavailability of specialist staff who only work  
436 during office hours. This is a major area of concern as these serious risks are preventable if  
437 adequate resources were in place.

438 ED overcrowding results in decreased access to an appropriate treatment space, and a  
439 decrease in adherence to the National Emergency Access Target (NEAT) (56). An increase  
440 in older people attendances with complex and chronic conditions are causes of overcrowding  
441 and it is recognised that there is need for efficient ED patient flow, using initiatives to meet  
442 timed patient disposition targets, as well as expanded primary care (57). Internationally, older  
443 adults have advocated for older adult services such as a geriatric ED to meet specific health  
444 needs for their cohort which could help to reduce overcrowding and wait times (58; 7. Similar  
445 difficulties were also highlighted in this study including increased wait times and older people  
446 having to frequently stay overnight on a chair in an over stimulated ED corridor, due to  
447 overcrowding, with a recommendation for specific older person areas.

448 Lowthian et al (59) reported a need for further research around safe older person ED discharge  
449 as a lack of consensus existed as to what forms evidence-based best practice for patients  
450 discharged from the ED. Enhancement of integrated care is required especially with regards  
451 to improved communications, sharing of responsibility between care providers, additional  
452 resources and further research evaluating care practices (60). Recognising the need to  
453 improve care for older patients in the ED, Lucke et al (61) developed expert clinical  
454 recommendations for Geriatric Emergency Medicine (GEM). Mooijaart et al (62) also  
455 recognised the rapid development of GEM in response to ageing demographics, proposing  
456 that further work, research and innovation is needed to provide holistic care for the older adult,  
457 including organisation of care, identification of patient preferences and needs, and improving  
458 HCP's knowledge and expertise. Respondents in this study also identified a need for improved  
459 documentation, staff training, and national discharge guidelines to ensure uniformity of  
460 discharge practices for older people from all EDs on a 24/7 basis.

461

## 462 **Strengths and weaknesses**

463 This study had several strengths and weaknesses. Firstly, whilst considerable research has  
464 been undertaken on ED matters in recent years, a dearth still exists in relation to out of hours  
465 ED discharge experiences. This study is the first of its kind to explore this important topic and  
466 has addressed the gap in research which existed. It is likely that the practices, experiences,  
467 and concerns regarding out of hours discharge seen in this study also pertain to EDs globally  
468 although there is a need for further international research. Secondly, participants included  
469 HCPs from a variety of backgrounds and from a wide geographical spread which enhanced  
470 the rigour of the study. This study identified diverse practices in healthcare, taking cognisance  
471 of the availability of resources and follow-up care, the geographical landscape, demographics,  
472 and cultural aspects in caring for older family members. However, additional participants such  
473 as occupational therapists and social workers may have generated additional insightful  
474 experiences.

475

## 476 **Conclusions**

477 Whilst the older adult cohort are one of the main attenders at EDs, many are subsequently  
478 discharged home. However, this study highlighted that if deemed not for admission but unfit  
479 for discharge home, older adults may experience a delayed discharge OOH. This principally  
480 occurs if a perceived biological/psychological/social risk is identified and/or if further  
481 assessment is required by members of the multi-disciplinary team, yet the service is  
482 unavailable OOH. Due to the multiple contesting factors within a dynamic emergency  
483 department, attendance and long waits therein can lead to a risk of serious adverse effects for  
484 the older adult including discomfort from inappropriate waiting areas, a lack of sleep, anxiety,  
485 and delirium. Patient experience times and ED flow can also be impacted. To ensure a safe

486 and effective discharge home 24/7 in every ED regardless of location, there is a need to  
487 address gaps in care identified. With the significant increase in older person demographics,  
488 there is an urgent need for healthcare managers and relevant policy makers to develop best  
489 practice guidelines, ensure greater availability of older people services and teams both in the  
490 ED and in the community, increase explicit older person ED treatment areas, and develop  
491 specific education courses and upskilling for ED staff. These recommendations can assist in  
492 achieving a safe and appropriate older person ED discharge around the clock.

493

## 494 **Supporting information:**

495 S1 Appendix 1: Interview schedule (DOC)

496 S2 Appendix 2 Standards for reporting qualitative research checklist (SRQR) (DOC)

497

## 498 **Acknowledgements**

499 The authors acknowledge the participating health care professionals for their interest, time,  
500 and honesty in this study, along with support and guidance received from members of the  
501 National Clinical Programme for Emergency Medicine and the Irish Association for Emergency  
502 Medicine.

503

## 504 **Conflict of interest**

505 The authors declare no conflict of interest.

506

## 507 **Author Contributions**

508 **Conceptualization:** Mary Dunnion, Assumpta Ryan, Debbie Goode, Sonja McIlfratrick.

509 **Formal analysis:** Mary Dunnion, Assumpta Ryan, Debbie Goode, Sonja McIlfratrick.

510 **Investigation:** Mary Dunnion.

511 **Methodology:** Mary Dunnion, Assumpta Ryan, Debbie Goode, Sonja McIlfratrick.

512 **Project administration:** Mary Dunnion.

513 **Supervision:** Assumpta Ryan, Debbie Goode, Sonja McIlfratrick.

514 **Writing– original draft:** Mary Dunnion

515 **Writing– review & editing:** Mary Dunnion, Assumpta Ryan, Debbie Goode, Sonja McIlfratrick.

516

## 517 **References**

518 1. World Health Organisation. Ageing and health. 2022. Available:

519 <https://www.who.int/news-room/fact-sheets/detail/ageing-and>

520 [health#:~:text=Every%20country%20in%20the%20world%20is%20experiencing%20](https://www.who.int/news-room/fact-sheets/detail/ageing-and-health#:~:text=Every%20country%20in%20the%20world%20is%20experiencing%20)

521 [growth,from%201%20billion%20in%202020%20to%201.4%20billion.](https://www.who.int/news-room/fact-sheets/detail/ageing-and-health#:~:text=Every%20country%20in%20the%20world%20is%20experiencing%20) Accessed:

522 07/06/2024

523 2. United Nations General Assembly. United Nations Decade of Healthy Ageing (2021-

524 2030): resolution/adopted by the General Assembly. 2020. United Nations, New York.

525 Available: [https://policycommons.net/artifacts/8967746/united-nations-decade-of-](https://policycommons.net/artifacts/8967746/united-nations-decade-of-healthy-ageing-2021-2030/9835673/)

526 [healthy-ageing-2021-2030/9835673/](https://policycommons.net/artifacts/8967746/united-nations-decade-of-healthy-ageing-2021-2030/9835673/) Accessed: 07/06/2024.

527 3. Eliopoulos C. Gerontological Nursing (Tenth edition). China, Wolters Kluwer; 2021.

528 4. World Health Organization. Decade of Healthy Ageing Baseline Report. World Health

529 Organization, Geneva; 2020.

530 5. Cassarino M, Robinson K, Trépel D, O'Shaughnessy Í, Smalle E, White S, Devlin C,

531 Quinn R, Boland F, Ward ME. and McNamara R. Impact of assessment and

- 532 intervention by a health and social care professional team in the emergency  
533 department on the quality, safety, and clinical effectiveness of care for older adults: A  
534 randomised controlled trial. *PLoS Medicine*, 2021; 18(7), p.e1003711.
- 535 6. Corcoran G, Bernard P, Kenna L, Malone A, Horgan F, O'Brien C, Ward P, Howard  
536 W, Hogan L, Mooney, R., Masterson, S. "Older People Want to Be in Their Own  
537 Homes": A Service Evaluation of Patient and Carer Feedback after Pathfinder  
538 Responded to Their Emergency Calls. *Prehospital Emergency Care*. 2023 ;27(7):866-  
539 874.
- 540 7. Mwakilasa, M. T., Foley, C., O'Carroll, T., Flynn, R., & Rohde, D. Care experiences of  
541 older people in the emergency department: a concurrent mixed-methods study.  
542 *Journal of Patient Experience*, 2021; 8, doi:10.1177/23743735211065267.
- 543 8. Goode, D., Ryan, A., Melby, V., & Slater, P. Care experiences of older people with  
544 mental health needs and their families in emergency medical services settings.  
545 *International Journal of Older People Nursing*, 2023; 18, e12500.  
546 <https://doi.org/10.1111/opn.12500>
- 547 9. Rowe, A., & Knox, M. The impact of the healthcare environment on patient experience  
548 in the Emergency Department: a systematic review to understand the implications for  
549 patient-centered design. *HERD: Health Environments Research & Design Journal*,  
550 2023; 16(2), 310-329.
- 551 10. Greenwald, P.W., Estevez, R.M., Clark, S., Stern, M.E., Rosen, T., Flomenbaum, N.  
552 The ED as the primary source of hospital admission for older (but not younger) adults.  
553 *The American Journal of Emergency Medicine*, 2016, 34, 6, pgs. 943-947. ISSN 0735-  
554 6757. <https://doi.org/10.1016/j.ajem.2015.05.041>
- 555 11. Cetin-Sahin D, Ducharme F, McCusker J, Veillette, N., Cossette, S., Minh Vu, T.,  
556 Vadeboncoeur, A., Lachance, P., Mah, R., Berthelot, S. Experiences of an Emergency  
557 Department Visit Among Older Adults and Their Families: Qualitative Findings from a  
558 Mixed-Methods Study. *Journal of Patient Experience*, 2020; 7(3):346-356.  
559 doi:10.1177/2374373519837238

- 560 12. Gettel, C.J., Serina, P.T., Uzamere, I., Hernandez-Bigos, K., Venkatesh, A.K., Rising,  
561 K.L., Goldberg, E.M., Feder, S.L. Cohen, A.B., Hwang, U. Emergency department-to-  
562 community care transition barriers: A qualitative study of older adults. *J Am Geriatr*  
563 *Soc.*, 2022; 70(11): 3152-3162.
- 564 13. Dunnion, M., Ryan, A., Goode, D., McIlfatrick, S. Supporting older people following out  
565 of hours discharge from the Emergency Department: An integrative review of the  
566 literature. *International Journal of Older People Nursing*, 2023; 18(3): e12529.
- 567 14. Hyslop, B. 'Not safe for discharge'? Words, values, and person-centred care. *Age and*  
568 *Ageing*, 2020; 49(3), 334-336.
- 569 15. World Health Organisation. World report on ageing and health. Geneva: World Health  
570 Organization.2015.Available:[https://iris.who.int/bitstream/handle/10665/326843/WHO](https://iris.who.int/bitstream/handle/10665/326843/WHO-FWC-ALC-19.1-eng.pdf?sequence=17)  
571 [-FWC-ALC-19.1-eng.pdf?sequence=17](https://iris.who.int/bitstream/handle/10665/326843/WHO-FWC-ALC-19.1-eng.pdf?sequence=17) Accessed: 19/08/2024.
- 572 16. Integrated Care Programme for Older People Steering Group. Making a start in  
573 integrated care for older persons a practical guide to the local implementation of  
574 integrated care programmes for older persons. 2017. Available:  
575 [https://www.hse.ie/eng/services/publications/clinical-strategy-and-programmes/a-](https://www.hse.ie/eng/services/publications/clinical-strategy-and-programmes/a-practical-guide-to-the-local-implementation-of-integrated-care-programmes-for-older-persons.pdf)  
576 [practical-guide-to-the-local-implementation-of-integrated-care-programmes-for-older-](https://www.hse.ie/eng/services/publications/clinical-strategy-and-programmes/a-practical-guide-to-the-local-implementation-of-integrated-care-programmes-for-older-persons.pdf)  
577 [persons.pdf](https://www.hse.ie/eng/services/publications/clinical-strategy-and-programmes/a-practical-guide-to-the-local-implementation-of-integrated-care-programmes-for-older-persons.pdf) Accessed 22/7/2024.
- 578 17. Braun, V. & Clarke, V. Thematic Analysis. A Practical Guide. Sage Publications; 2022.
- 579 18. Braun, V. & Clarke, V. One size fits all? What counts as quality practice in (reflexive)  
580 thematic analysis? *Qualitative Research in Psychology*, 2021; 18:3, 328-352.
- 581 19. Jamieson, M. K., Govaart, G. H., & Pownall, M. Reflexivity in quantitative research: A  
582 rationale and beginner's guide. *Social and Personality Psychology Compass*, 2023;  
583 17(4), e12735.
- 584 20. Olmos-Vega, F. M., Stalmeijer, R. E., Varpio, L., & Kahlke, R. A practical guide to  
585 reflexivity in qualitative research: AMEE Guide No. 149. *Medical teacher*, 2023; 45(3),  
586 241-251.



- 587 21. O'Brien BC, Harris IB, Beckman TJ, Reed DA, Cook DA. Standards for reporting  
588 qualitative research: a synthesis of recommendations. *Academic Medicine*, 2014; 89  
589 (9):1245-1251. DOI: 10.1097/ACM.0000000000000388
- 590 22. World Health Organisation Patient Safety and World Health Organization. Conceptual  
591 framework for the international classification for patient safety version 1.1: final  
592 technical report January 2009 (No. WHO/IER/PSP/2010.2). Report No.: 606940937X.  
593 Geneva, World Health Organization, 2010.
- 594 23. Slawomirski, L., Aaraaen, A., Klazinga, N.S. "The economics of patient  
595 safety: Strengthening a value-based approach to reducing patient harm at national  
596 level", OECD Health Working Papers, 2017, No. 96, OECD Publishing,  
597 Paris. <https://doi.org/10.1787/5a9858cd-en>.
- 598 24. Hess, E. P., Grudzen, C. R., Thomson, R., Raja, A. S., & Carpenter, C. R. Shared  
599 decision-making in the emergency department: respecting patient autonomy when  
600 seconds count. *Academic Emergency Medicine*, 2015; 22(7), 856-864.
- 601 25. Hardy C, Whitwell D, Sarsfield B, Maimaris, C. Admission avoidance and early  
602 discharge of acute hospital admissions: an accident and emergency-based scheme.  
603 *Emergency Medicine Journal*, 2001; 18:435-440.
- 604 26. Health Service Executive. Enhanced Community Care. 2024. Available:  
605 [https://www.hse.ie/eng/services/list/2/primarycare/enhanced-community-](https://www.hse.ie/eng/services/list/2/primarycare/enhanced-community-care/#:~:text=The%20ECC%20programme%20has%20delivered:%201.%2096%20o)  
606 [care/#:~:text=The%20ECC%20programme%20has%20delivered:%201.%2096%20o](https://www.hse.ie/eng/services/list/2/primarycare/enhanced-community-care/#:~:text=The%20ECC%20programme%20has%20delivered:%201.%2096%20o)  
607 [f](https://www.hse.ie/eng/services/list/2/primarycare/enhanced-community-care/#:~:text=The%20ECC%20programme%20has%20delivered:%201.%2096%20o) Accessed 17/07/2024.
- 608 27. O'Shaughnessy, Í., Romero-Ortuno, R., Edge, L., Dillon, A., Flynn, S., Briggs, R.,  
609 Shields, D., McMahon, G., Hennessy, A., Kennedy, U. and Staunton, P. Home FIRsT:  
610 interdisciplinary geriatric assessment and disposition outcomes in the emergency  
611 department. *European journal of internal medicine*, 2021; 85, pp.50-55.
- 612 28. Conneely, M., Leahy, S., O'Connor, M., Corey, G., Gabr, A., Saleh, A., Okpaje, B.,  
613 O'Shaughnessy, Í., Synnott, A., McCarthy, A. and Holmes, A. A physiotherapy-led  
614 transition to home intervention for older adults following emergency department

- 615 discharge: a pilot feasibility randomised controlled trial (ED PLUS). *Clinical*  
616 *Interventions in Aging*, 2023; pp.1769-1788.
- 617 29. Carpenter, C. R., Shelton, E., Fowler, S., Suffoletto, B., Platts-Mills, T. F., Rothman,  
618 R. E., & Hogan, T. M. Risk factors and screening instruments to predict adverse  
619 outcomes for undifferentiated older emergency department patients: a systematic  
620 review and meta-analysis. *Academic Emergency Medicine*, 2015; 22(1), 1-21.
- 621 30. Zachariasse, J.M., Seiger, N., Rood, P.P., Alves, C.F., Freitas, P., Smit, F.J.,  
622 Roukema, G.R. and Moll, H.A. Validity of the Manchester Triage System in emergency  
623 care: A prospective observational study. *PloS ONE*, 2017; 12(2), p.e0170811.
- 624 31. Brouns, S. H., Mignot-Evers, L., Derkx, F., Lambooj, S. L., Dieleman, J. P., & Haak,  
625 H. R. Performance of the Manchester triage system in older emergency department  
626 patients: a retrospective cohort study. *BMC Emergency Medicine*, 2019; 19, 1-11.
- 627 32. Church, S., Rogers, E., Rockwood, K., & Theou, O. A scoping review of the Clinical  
628 Frailty Scale. *BMC geriatrics*, 2020; 20, 1-18.
- 629 33. Rockwood, K., Song, X., MacKnight, C., Bergman, H., Hogan, D.B., McDowell, I.,  
630 Mitnitski, A. A global clinical measure of fitness and frailty in elderly people. *Canadian*  
631 *Medical Association Journal*, 2005; 173(5):489-495.
- 632 34. European Taskforce on Geriatric Emergency Medicine (ETGEM) Collaborators.  
633 Prevalence of Frailty in European Emergency Departments (FEED): an international  
634 flash mob study. *European Geriatric Medicine*, 2024; 15(2):463-470.
- 635 35. Elliott, A., Taub, N., Banerjee, J., Aijaz, F., Jones, W., Teece, L., van Oppen, J. and  
636 Conroy, S. Does the clinical frailty scale at triage predict outcomes from emergency  
637 care for older people? *Annals of emergency medicine*, 2021; 77(6), pp.620-627.
- 638 36. Blomaard, L.C., Speksnijder, C., Lucke, J.A., de Gelder, J., Anten, S., Schuit, S.C.,  
639 Steyerberg, E.W., Gussekloo, J., de Groot, B. and Mooijaart, S.P. Geriatric screening,  
640 triage urgency, and 30-day mortality in older emergency department patients. *Journal*  
641 *of the American Geriatrics Society*, 2020; 68(8), pp.1755-1762.

- 642 37. Ng, C.J., Chien, L.T., Huang, C.H., Chaou, C.H., Gao, S.Y., Sherry, Y.H.C., Hsu, K.H.  
643 & Chien, C.Y. Integrating the clinical frailty scale with emergency department triage  
644 systems for elder patients: A prospective study. *The American Journal of Emergency*  
645 *Medicine*, 2023; 66, pp.16-21.
- 646 38. Elliott, A., Phelps, K., Regen, E., & Conroy, S. P. Identifying frailty in the Emergency  
647 Department—feasibility study. *Age and ageing*, 2017; 46(5), 840-845.
- 648 39. O’Shaughnessy, Í., Robinson, K., Whiston, A., Barry, L., Corey, G., Devlin, C.,  
649 Hartigan, D., Synnott, A., McCarthy, A., Moriarty, E. and Jones, B. Comprehensive  
650 geriatric assessment in the emergency department: a prospective cohort study of  
651 process, clinical, and patient-reported outcomes. *Clinical Interventions in Aging*, 2024;  
652 pp.189-201.
- 653 40. van Dam, C.S., Hoogendijk, E.O., Mooijaart, S.P., Smulders, Y.M., de Vet, R.C.,  
654 Lucke, J.A., Blomaard, L.C., Otten, R.H., Muller, M., Nanayakkara, P.W. and  
655 Trappenburg, M.C. A narrative review of frailty assessment in older patients at the  
656 emergency department. *European Journal of Emergency Medicine*, 2021; 28(4),  
657 pp.266-276.
- 658 41. Moloney, E., O’Donovan, M.R., Carpenter, C.R., Salvi, F., Dent, E., Mooijaart, S.,  
659 Hoogendijk, E.O., Woo, J., Morley, J., Hubbard, R.E. and Cesari, M. Core  
660 requirements of frailty screening in the emergency department: an international Delphi  
661 consensus study. *Age and ageing*, 2024; 53(2), p. afae013.
- 662 42. Conroy, S., Carpenter, C., Banerjee, J. Silver Book II Quality Care for Older People  
663 with Urgent Care Needs [Online]. 2021. Available: [Silver Book II | British Geriatrics](#)  
664 [Society \(bgs.org.uk\)](#) Accessed: 07/06/2024.
- 665 43. van Oppen, J. D., & Suzanne, M. Frailty screening in the Emergency Department: why  
666 does it matter? *Age and Ageing*, 2024; 53(4), afae056.
- 667 44. Hammel, I. S., & Chapman, E. N. Frailty training among healthcare professionals. *The*  
668 *Journal of nutrition, health and aging*, 2024; 28 (6), 100258.

- 669 45. Ali, P. A., & Watson, R. Language barriers and their impact on provision of care to  
670 patients with limited English proficiency: Nurses' perspectives. *Journal of Clinical*  
671 *Nursing*, 2018; 27(5-6), e1152-e1160.
- 672 46. World Health Organisation. Addressing the international migration of health workers.  
673 2024. Available: [Addressing the international migration of health workers \(who.int\)](#)  
674 Accessed: 13/8/2024.
- 675 47. Benjenk, I., DuGoff, E.H., Jacobsohn, G.C., Cayenne, N., Jones, C.M., Caprio, T.V.,  
676 Cushman, J.T., Green, R.K., Kind, A.J., Lohmeier, M. and Mi, R. Predictors of older  
677 adult adherence with emergency department discharge instructions. *Academic*  
678 *Emergency Medicine*, 2021; 28(2), pp.215-225.
- 679 48. Hoek, A. E., Anker, S. C., van Beeck, E. F., Burdorf, A., Rood, P. P., & Haagsma, J.  
680 A. Patient discharge instructions in the emergency department and their effects on  
681 comprehension and recall of discharge instructions: a systematic review and meta-  
682 analysis. *Annals of Emergency Medicine*, 2020; 75(3), 435-444.
- 683 49. Nagurney, J. M., Fleischman, W., Han, L., Leo-Summers, L., Allore, H. G., & Gill, T.  
684 M. Emergency department visits without hospitalization are associated with functional  
685 decline in older persons. *Annals of emergency medicine*, 2017; 69(4), 426-433.
- 686 50. Memedovich, A., Asante, B., Khan, M., Eze, N., Holroyd, B. R., Lang, E., Kashuba, S.,  
687 Clement, F. Strategies for improving ED-related outcomes of older adults who seek  
688 care in emergency departments: a systematic review. *International Journal of*  
689 *Emergency Medicine*, 2024; 17, 16. <https://doi.org/10.1186/s12245-024-00584-7>.
- 690 51. Condon, B., Griffin, A., Fitzgerald, C., Shanahan, E., Glynn, L., O'Connor, M., Hayes,  
691 C., Manning, M., Galvin, R., Leahy, A. and Robinson, K. Older adults experience of  
692 transition to the community from the emergency department: a qualitative evidence  
693 synthesis. *BMC geriatrics*, 2024; 24(1), p.233.
- 694 52. Central Statistics Office. Measuring Distance to Everyday Services in Ireland [Health](#)  
695 [Services Measuring Distance to Everyday Services in Ireland - Central Statistics](#)

- 696 [Office. 2024. Available: Introduction Measuring Distance to Everyday Services in](#)  
697 [Ireland - Central Statistics Office](#) Accessed 19/07/202
- 698 53. Lennox, A., Braaf, S., Smit, D. V., Cameron, P., & Lowthian, J. A. (2019) Caring for  
699 older patients in the emergency department: health professionals' perspectives from  
700 Australia—the safe elderly emergency discharge project. *Emergency Medicine*  
701 *Australasia*, 2019; 31(1), 83-89.
- 702 54. Watkins, S., Murphy, F., Kennedy, C., Graham, M., & Dewar, B. Caring for older people  
703 with dementia in the emergency department. *British Journal of Nursing*, 2020; 29(12),  
704 692-699.
- 705 55. Aleksandrovskiy, I., Ganti, L., Simmons, S. The Emergency Department Patient  
706 Experience: In Their Own Words. *Journal of Patient Experience*, 2022; 20;9,1-4.
- 707 56. Smith, B., Bouchoucha, S., & Watt, E. 'Care in a chair'—The impact of an overcrowded  
708 Emergency Department on the time to treatment and length of stay of self-presenting  
709 patients with abdominal pain. *International Emergency Nursing*, 2016; 29, 9-14.
- 710 57. Morley, C., Unwin, M., Peterson, G. M., Stankovich, J., & Kinsman, L. Emergency  
711 department crowding: a systematic review of causes, consequences, and solutions.  
712 *PLoS ONE*, 2018; 13(8), e0203316.
- 713 58. American College of Emergency Physicians. Policy Statement. Safe Discharge from  
714 the Emergency Department. Dallas, American College of Emergency  
715 Physicians. 2019.
- 716 59. Lowthian, J. A., McGinnes, R. A., Brand, C. A., Barker, A. L., & Cameron, P. A.  
717 Discharging older patients from the emergency department effectively: a systematic  
718 review and meta-analysis. *Age and ageing*, 2015; 44(5), 761-770.
- 719 60. Dunlea, S., McCombe, G., Broughan, J., Carroll, Á., Fawsitt, R., Gallagher, J., Melin,  
720 K. and Cullen, W. Priorities in integrating primary and secondary care: a multimethod  
721 study of GPs. *Journal of Integrated Care*, 2022; 31(5), pp.1-14.
- 722 61. Lucke JA, Mooijaart SP, Heeren P, Singler K, McNamara R, Gilbert T, Nickel CH,  
723 Castejon S, Mitchell A, Mezera V, Van der Linden L, Lim SE, Thaur A, Karamercan

724 MA, Blomaard LC, Dundar ZD, Chueng KY, Islam F, de Groot B, Conroy S. Providing  
725 care for older adults in the Emergency Department: expert clinical recommendations  
726 from the European Task Force on Geriatric Emergency Medicine. *European Geriatric*  
727 *Medicine*, 2022; 13(2):309-317. doi: 10.1007/s41999-021-00578-1. Epub 2021 Nov 5.  
728 PMID: 34738224; PMCID: PMC8568564.

729 62. Mooijaart, S. P., Carpenter, C. R., & Conroy, S. P. Geriatric emergency medicine—a  
730 model for frailty friendly healthcare. *Age and Ageing*, 2022; 51(3), afab280.
